# Supplementary material for: Bacterial variation in the oral microbiota in multiple sclerosis patients
Source: PubMed Central journal article supplement (PMC8631616; doi:10.1371/journal.pone.0260384), 2021-11-30

1 2 3 4 5 6 7 8 9 10 11 12 13 14

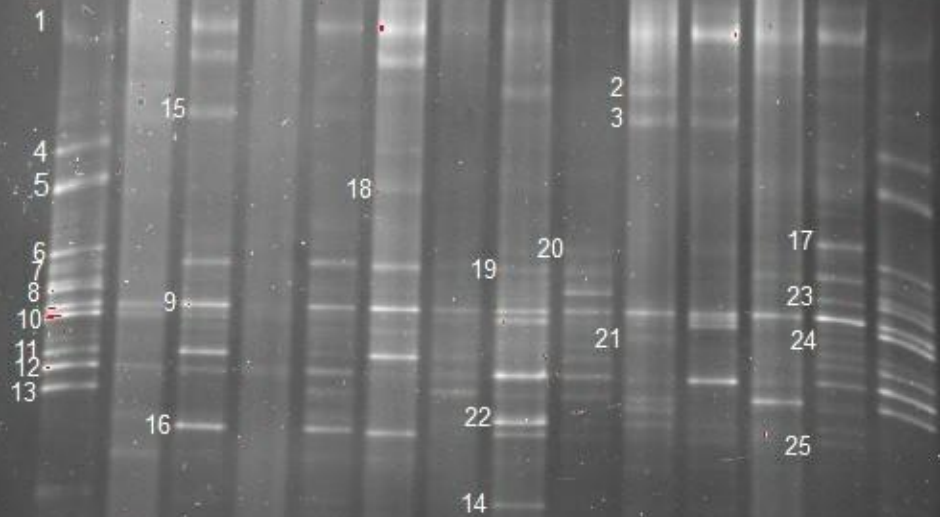

Supplement: pone.0260384.s001.pdf [file pone.0260384.s001.pdf]
